# Supplementary figures and images for: Improvement of hepatic innate immunity in chemically-injured livers to develop hepatocarcinoma by a serine type-protease inhibitors enriched extract from Chenopodium quinoa
Source: Royal Society of Chemistry journal article supplement (doi:10.1039/d3fo03083k), 2024-01-01

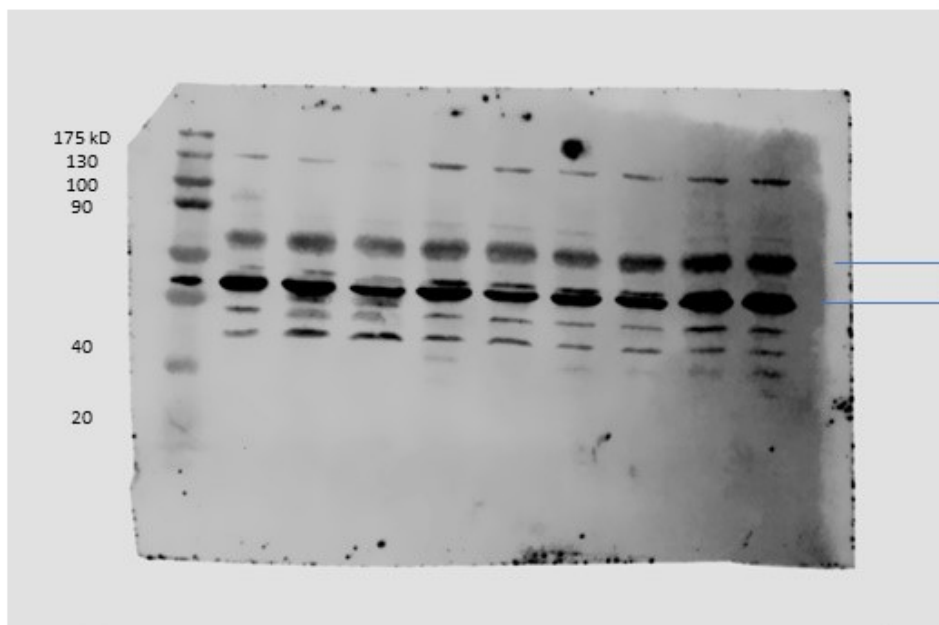

STAT3

B-actin

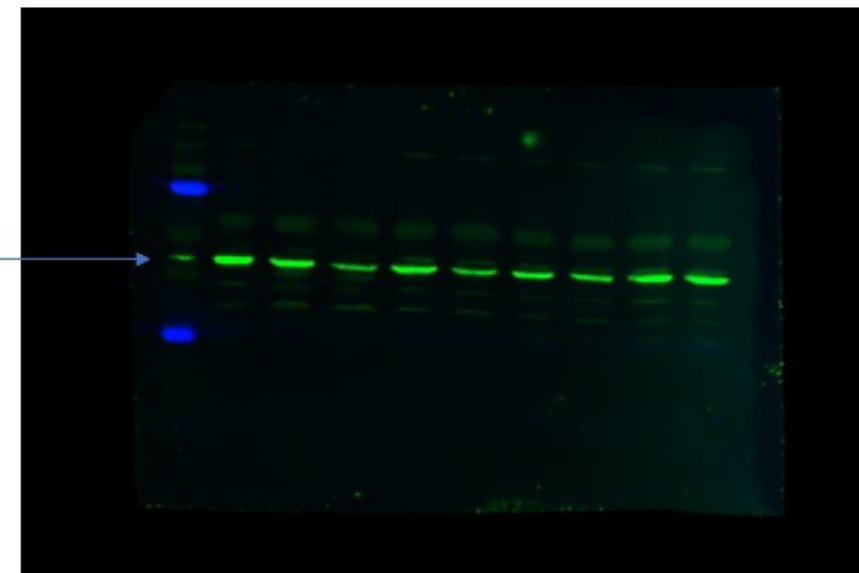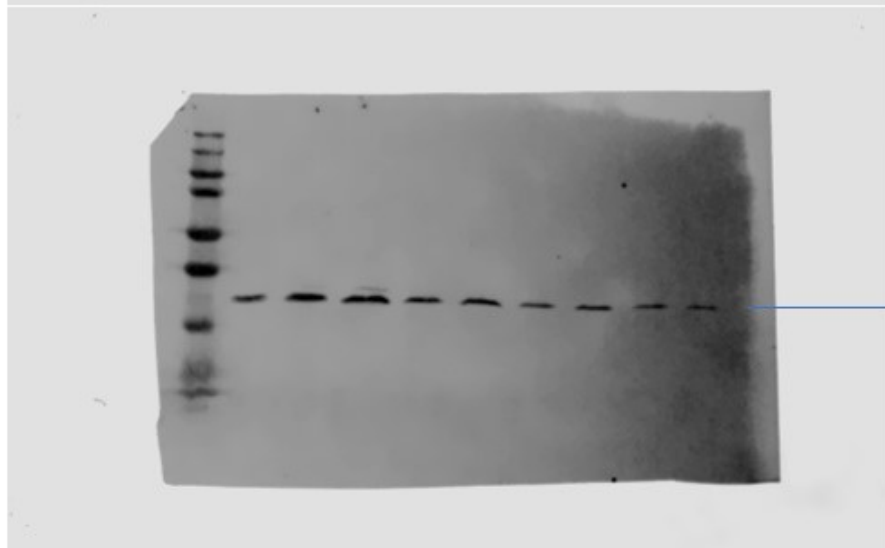

HO

Supplement: d3fo03083k1.pdf [file d3fo03083k1.pdf]
